# Supplementary material for: Shared decision making interventions in mental healthcare: a protocol for an umbrella review
Source: HighWire-hosted journal article supplement (doi:10.1136/bmjopen-2021-051283), 2021-09-01
Supplement: bmjopen-2021-051283supp001_data_supplement.pdf [file bmjopen-2021-051283supp001_data_supplement.pdf]

## Appendix 1: Search strategy for Ovid MEDLINE.

1. exp Decision Making/
2. exp Decision Support Techniques/
3. Decision Support Systems, Clinical/
4. "shared decision-making" OR "shared decision making" OR "decision process" OR "decision support" mp. [mp=title, abstract, original title, name of substance word, subject heading word, keyword heading word, protocol supplementary concept, rare disease supplementary concept, unique identifier]
5. ((process\* OR support\* OR aid\* OR share\* OR mak\* OR individual\* OR sharing OR informed) adj2 (decid\* OR decision\* OR choice)) mp. [mp=title, abstract, original title, name of substance word, subject heading word, keyword heading word, protocol supplementary concept, rare disease supplementary concept, unique identifier]
6. 1 OR 2 OR 3 OR 4 OR 5
7. exp Mental Disorders/
8. Mental Health/
9. Mentally Ill Persons/
10. ((mental\* OR psychiatr\* OR psycholog\*) adj2 (problem\* OR difficult\* OR disorder\* OR disease\* OR ill\* OR health\*)) mp. [mp=title, abstract, original title, name of substance word, subject heading word, keyword heading word, protocol supplementary concept, rare disease supplementary concept, unique identifier]
11. 7 OR 8 OR 9 OR 10
12. exp Mood Disorders/ OR Depressive Disorder/ OR Bipolar Disorder/ OR affective disorder\* OR depressive disorder\* OR depression\* OR mania\* OR bipolar disorder\* OR dysthymic disorder\* OR dysthymia\* OR affective disturbance\* OR affective ill\* OR mood disturbance\* mp. [mp=title, abstract, original title, name of substance word, subject heading word, keyword heading word, protocol supplementary concept, rare disease supplementary concept, unique identifier]
13. exp Anxiety Disorders/ OR Neurotic Disorders/ OR Obsessive-Compulsive Disorder/ OR Panic Disorder/ OR Phobic Disorders/ OR Stress Disorders, Post-traumatic/ OR anxiety disorder\* OR neurotic disorder\* OR obsessive-compulsive disorder\* OR panic disorder\* OR phobic disorder\* OR phobia\* OR generalized anxiety disorder\* OR generalised anxiety disorder\* OR posttraumatic stress disorder\* mp. [mp=title, abstract, original title, name of substance word, subject heading word, keyword heading word, protocol supplementary concept, rare disease supplementary concept, unique identifier]
14. exp "Trauma and Stressor Related Disorders"/ OR Stress Disorders, Traumatic/ OR Psychological Trauma/ OR Psychological Distress/ OR Stress, Psychological/ OR trauma\* OR stress disorder\* OR psychological distress\* OR emotional distress\* mp. [mp=title, abstract, original title, name of substance word, subject heading word, keyword heading word, protocol supplementary concept, rare disease supplementary concept, unique identifier]
15. exp Personality Disorders/ OR personality disorder\* OR personality patholog\* OR personality difficult\* OR disordered personalit\* mp. [mp=title, abstract, original title, name of substance word, subject heading word, keyword heading word, protocol supplementary concept, rare disease supplementary concept, unique identifier]
16. exp Substance-Related Disorders/ OR Alcohol-Related Disorders/ OR Illicit Drugs/ OR Alcoholism/ OR Binge Drinking/ OR "drug abuse" OR "substance abuse" OR "alcohol abuse" OR "drug dependence" OR "substance dependence" OR "alcohol dependence" OR "drug addiction" OR "substance addiction" OR "alcohol addiction" OR "substance-use disorder" OR "alcohol-use disorder" OR alcoholi\* OR binge drink\* mp. [mp=title, abstract, original title, name of substance word, subject heading word, keyword heading word, protocol supplementary concept, rare disease supplementary concept, unique identifier]

17. exp Affective Disorders, Psychotic/ OR Psychotic Disorders/ OR Paranoid Disorders/ OR Schizophrenia/ OR delusion\* OR hallucinat\* OR schizophren\* OR "psychosis" OR "schizoaffective" OR "psychotic" OR "paranoid"
18. exp "Feeding and Eating Disorders"/
19. ((exp Anorexia Nervosa/ OR Anorexia/) OR (exp Bulimia Nervosa/ OR Bulimia/ OR Binge-Eating Disorder/)) OR ((anorexi\* OR bulimi\*) AND nervosa) OR eating disorder\* OR binge-eat\* OR (bing\* adj2 eat\*) OR (compulsive adj2 (eat\* OR vomit\* or purg\*)) mp. [mp=title, abstract, original title, name of substance word, subject heading word, keyword heading word, protocol supplementary concept, rare disease supplementary concept, unique identifier]
20. 12 OR 13 OR 14 OR 15 OR 16 OR 17 OR 18 OR 19
21. ((systematic OR scoping OR literature) ADJ (review\* OR overview\*)) OR "review\* of reviews" OR meta-analy\* OR metaanaly\* OR ((systematic OR evidence) ADJ1 assess\*) OR metasynthe\* OR meta-synthe\*.tw. OR exp Review Literature as Topic/ OR exp Review/ OR Meta-Analysis as Topic/ OR Meta-Analysis/ OR "systematic review"/
22. 6 AND 11 AND 20 AND 21
23. Limit 22 to (English and yr= "2010-2021")
